# Supplementary material
Source: publisher figshare collection journal article supplement (https://tandf.figshare.com/articles/dataset/_/28172169)
Supplement: Supplementary file 1 [file 1]

Journal of Vertebrate Paleontology

Supplementary figures to:

A new ornithomimid theropod from the Upper Cretaceous Bissekty Formation of Uzbekistan

Alexander O. Averianov 1* and Hans-Dieter Sues2

1Department of Theriology, Zoological Institute, Russian Academy of Sciences, St. Petersburg, 199034, Russia, dzharakuduk@mail.ru;

2Department of Paleobiology, National Museum of Natural History, Smithsonian Institution, Washington, D.C. 20560, U.S.A., suesh@si.edu

Supplementary Figure S1. Strict consensus tree of 5 MPTs from the TNT phylogenetic analysis.

Supplementary Figure S2. Strict consensus tree of 6 MPTs from the TNT pruned phylogenetic analysis.
